# Supplementary material for: Improved Cognitive Performances in Trace Amine-Associated Receptor 5 (TAAR5) Knock-out Mice
Source: Preprints.org preprint supplement (doi:10.20944/preprints202201.0385.v1), 2022-01-25
Supplement: Supplementary file 1 [file supplementary]

## Supplementary Figures

**a**

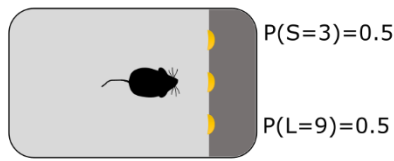

**b**

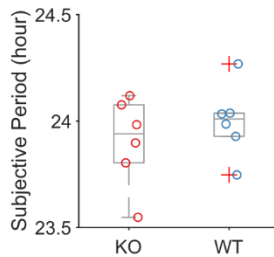

**c**

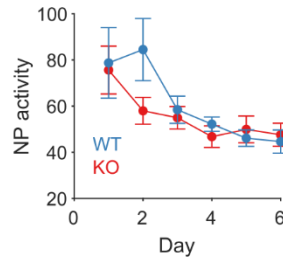

**d**

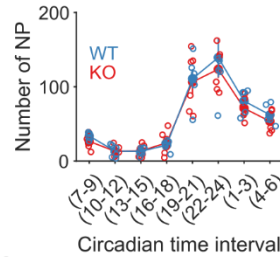

**e**

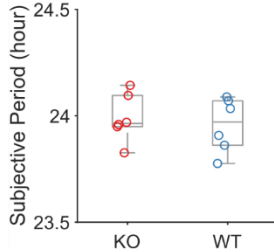

**f**

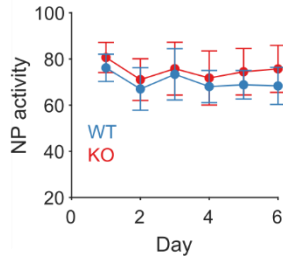

**g**

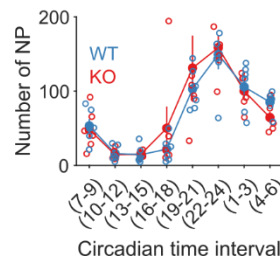

**Supplementary Figure 1: Circadian activity over training.** **a.** Schematic representation of the task. The probability of short (S) and long (L) signal was 50%. The duration of the short and long signal was 3 and 9 seconds, respectively. **b-d.** Refers to the first week of training. **e-g.** Refers to the second week of training. **b,e.** Boxplot distribution of circadian period for each group. Boxplots shows median (horizontal line within the box), interquartile range (grey box) and outliers (red pluses). Each dot is a subject ( $n=6$  WT and  $n=6$  KO). **c,f.** Average  $\pm$  SEM number of nose-pokes per hour for each day of training. In panel **c** there is a significant effect of time (2-way ANOVA,  $p<0.001$ ,  $F=5.55$ ), but not group (2-way ANOVA,  $p=0.2$ ,  $F=1.36$ ). No effects in panel **f** (2-way ANOVA, effect of time  $p=0.9$ ,  $F=0.28$ ; effect of group  $p=0.38$ ,  $F=0.77$ ). **d-g.** Mean  $\pm$  SEM nose-poke per hour across the circadian cycle displayed as intervals of three hours. Each empty circle is a subject. Significant effect of time but not group in both weeks (2-way ANOVA. Week 1, effect of time  $p<0.001$ ,  $F=43.01$ ; effect of group  $p=0.2$ ,  $F=1.17$ . Week 2, effect of time  $p<0.001$ ,  $F=19.45$ ; effect of group  $p=0.6$ ,  $F=0.27$ ).

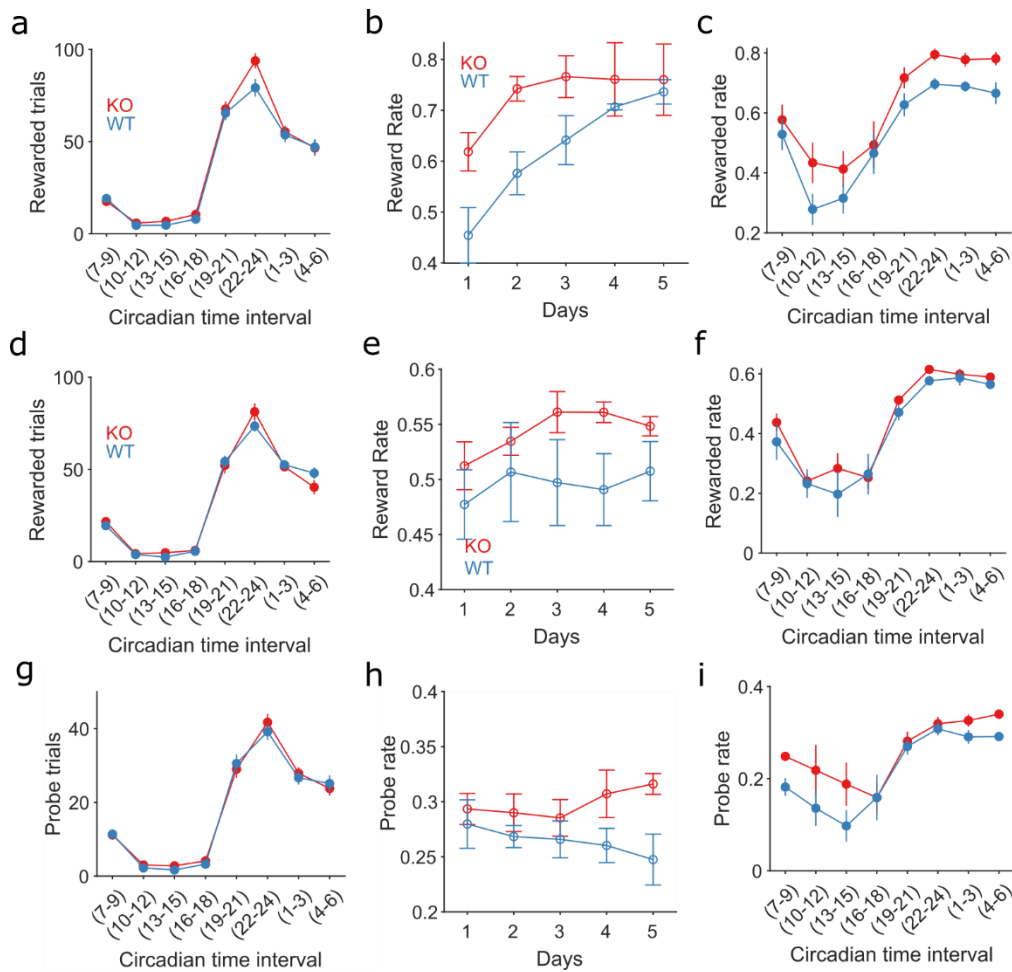

**Supplementary Figure 2: KO mice perform a higher proportion of correct trials.** **a.** Number of rewarded trials per hour along the circadian cycle grouped by intervals of three hours during week 1. Mean  $\pm$  SEM for each group. KO mice (red) and WT (blue). Rewarded trials include correct trials without probes. 2-way Anova, effect of time  $p < 0.005$ ,  $F = 206.86$ , no effect of group  $p = 0.07$ ,  $F = 3.3$ . **b.** Reward rate per day during the first week of training. 2-way Anova, effect of time  $p < 0.005$ ,  $F = 6.78$ , effect of group  $p < 0.005$ ,  $F = 13.23$ . **c.** Reward rate per hour along the circadian cycle grouped by intervals of three hours during week 1. 2-way Anova, effect of time  $p < 0.005$ ,  $F = 23.87$ , effect of group  $p < 0.005$ ,  $F = 14.54$ . **d.** Similar to panel a for week 2. 2-way Anova, effect of time  $p < 0.005$ ,  $F = 222.88$ , no effect of group  $p = 0.8$ ,  $F = 0.06$ . **e.** Similar to panel b for week 2. 2-way Anova no effect of time,  $p = 0.7$ ,  $F = 0.55$ , effect of group  $p = 0.008$ ,  $F = 7.6$ . **f.** Similar to panel c for week 2. 2-way Anova, effect of time  $p < 0.005$ ,  $F = 34.1$ , no effect of group  $p = 0.09$ ,  $F = 2.86$ . **g.** Number of probe trials per hour along the circadian cycle during week 2. 2-way Anova, effect of time  $p < 0.005$ ,  $F = 157.33$ , no effect of group  $p = 0.6$ ,  $F = 0.27$ . **h.** Probe rate per day during the second week of training. 2-way Anova, no effect of time  $p = 0.9$ ,  $F = 0.12$ , effect of group  $p < 0.005$ ,  $F = 9.82$ . **i.** Proportion of probe trial per hour along the circadian cycle grouped by interval of three hours during week 2. 2-way Anova, effect of time  $p < 0.005$ ,  $F = 12.73$ , effect of group  $p < 0.005$ ,  $F = 8.84$ .

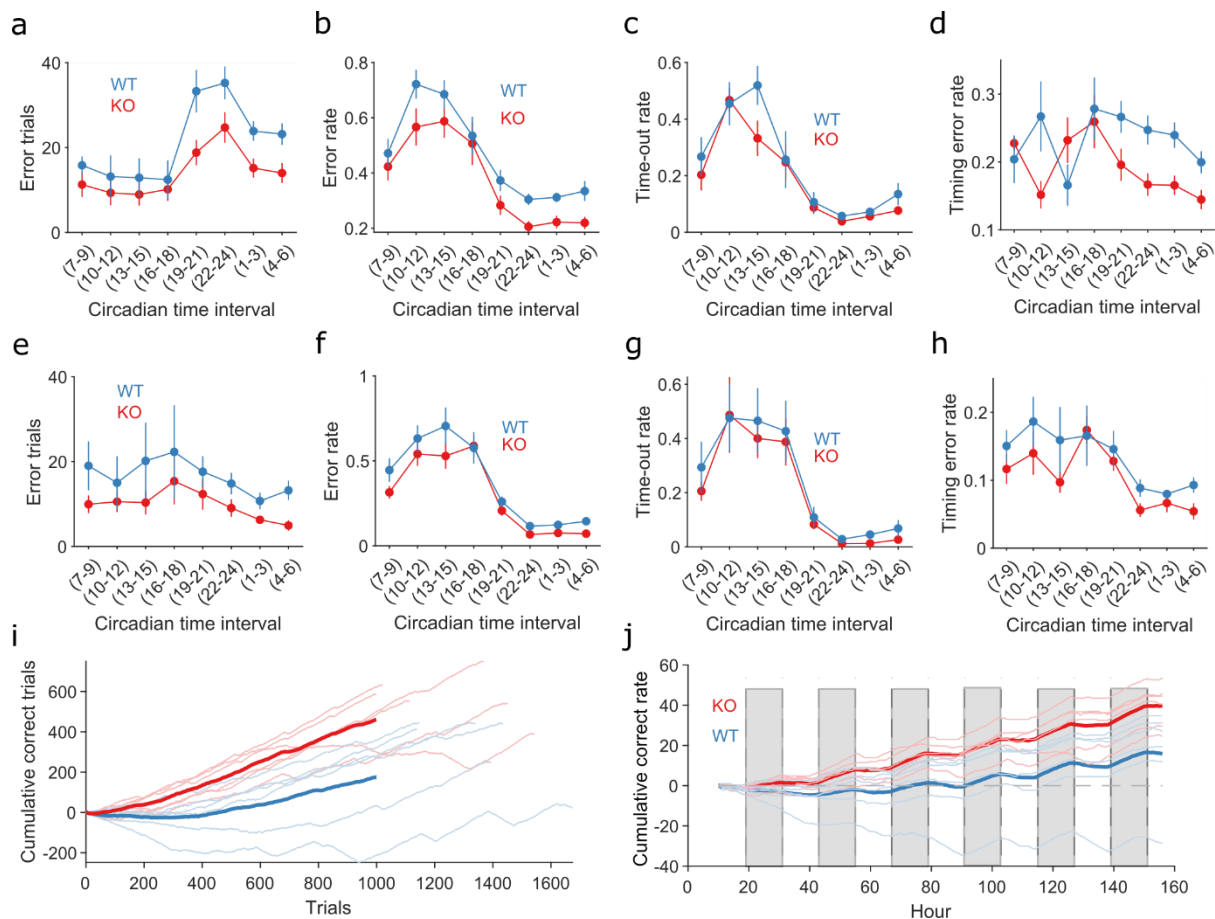

**Supplementary Figure 3: title.** **a.** Absolute number of error trials over the circadian cycle during the first week of training. Values show mean  $\pm$  SEM as per panels b-h. (2-way ANOVA: significant effect of time  $p < 0.005$ ,  $F = 9.06$  and group,  $p < 0.005$ ,  $F = 17.66$ ). **b.** Error rate over the circadian cycle for interval of three hours. 2-way ANOVA significant effect of time  $p < 0.005$ ,  $F = 23.87$  and group,  $p < 0.005$ ,  $F = 14.54$ . **c.** Time-out rate over the circadian cycle for the first week of training. 2-way ANOVA significant effect of time,  $p < 0.005$ ,  $F = 19.66$ , no effect of group  $p = 0.08$ ,  $F = 3.03$ . **d.** Timing error rate during the first week of training along the circadian cycle. 2-way ANOVA no effect of time  $p = 0.07$ ,  $F = 1.93$ , significant effect of group,  $p = 0.005$ ,  $F = 8.11$ . **e.** Similar to panel a for the second week of training. 2-way ANOVA no effect of time  $p = 0.43$ ,  $F = 1$ , significant effect of group,  $p = 0.006$ ,  $F = 7.82$ . **f.** Similar to panel b for the second week of training. 2-way ANOVA significant effect of time,  $p < 0.005$ ,  $F = 34.42$  and group,  $p = 0.008$ ,  $F = 7.32$ . **g.** Similar to panel c for the second week of training. 2-way ANOVA significant effect of time,  $p < 0.005$ ,  $F = 14$ , no effect of group  $p = 0.32$ ,  $F = 1$ . **h.** Similar to panel d. 2-way ANOVA significant effect of time,  $p < 0.005$ ,  $F = 5.23$  and group,  $p = 0.02$ ,  $F = 5.57$ . **i.** Cumulative correct trials over the first week of training. Solid lines are group average. Each light color curve is a subject. **j.** Cumulative correct rate for each hour of the first week of training. Solid lines are group average. Each light color curve is a subject. Vertical grey boxes identify the dark phases.
